# Supplementary material for: Isorhapontigenin is a novel potential therapeutic agent for lung cancer： evidence from network pharmacology, bioinformatics, molecular docking and in vitro experiments
Source: Research Square preprint supplement (doi:10.21203/rs.3.rs-5882443/v1), 2025-02-04
Supplement: Supplementary file 1 [file 28eaeb4c4dc63f9cd77bed45.docx]

Regarding the Data Availability statement for the manuscript titled *Isorhapontigenin is a Novel Potential Therapeutic Agent for Lung Cancer: Evidence from Network Pharmacology, Bioinformatics, Molecular Docking, and In Vitro Experiments*:

**All data generated or analyzed during this study are included in the article.**
