# Supplementary material for: Isorhapontigenin is a novel potential therapeutic agent for lung cancer： evidence from network pharmacology, bioinformatics, molecular docking and in vitro experiments
Source: Research Square preprint supplement (doi:10.21203/rs.3.rs-5882443/v1), 2025-02-04
Supplement: Supplementary file 2 [file 6950eabbf791b78da1375b63.docx]

PubChem database : <https://pubchem.ncbi.nlm.nih.gov/>

BATMAN-TCM : <http://bionet.ncpsb.org.cn/batman-tcm/>

STITCH database : <http://stitch-beta.embl.de/>

the human gene database Genecards ：<https://www.genecards.org/>

Venn website ：<http://bioinformatics.psb.ugent.be/webtools/Venn/>

STRING database ：<https://www.string-db.org/>

Metascape platform：<https://metascape.org/>

RCSBPDB database ： <https://www.uniprot.org/>

Kaplan-Meier Plotter (KM Plotter) database *：*<https://kmplot.com/analysis/>

Gene Expression Profiling Interactive Analysis (GEPIA) database ：

<http://gepia2.cancer-pku.cn/#survival>

HPA database：<https://www.proteinatlas.org/>
