# Supplementary material for: Isorhapontigenin is a novel potential therapeutic agent for lung cancer： evidence from network pharmacology, bioinformatics, molecular docking and in vitro experiments
Source: Research Square preprint supplement (doi:10.21203/rs.3.rs-5882443/v1), 2025-02-04
Supplement: Supplementary file 3 [file 73f8f6f66a365aadd221d9f6.docx]

**This study provides original data and supplementary information available for peer review. The link is as follows:**

[**https://www.jianguoyun.com/p/DdJbp_AQ7oOIDRjZ7d8FIAA**](https://www.jianguoyun.com/p/DdJbp_AQ7oOIDRjZ7d8FIAA)
